# Supplementary material
Source: PubMed Central journal article supplement (PMC2688829)
Supplement: NIHMS117251-supplement-SuppData.pdf [file NIHMS117251-supplement-SuppData.pdf]

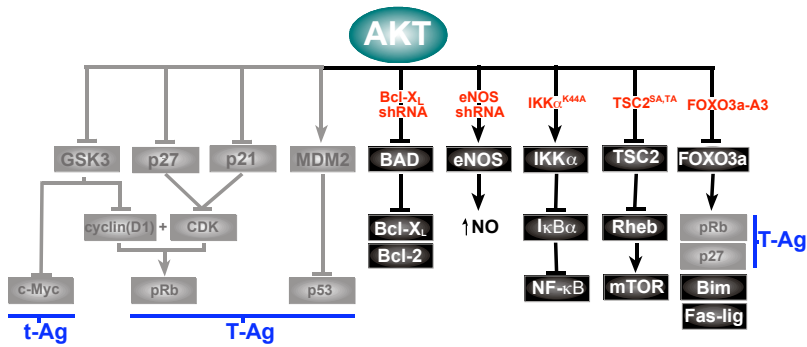

**Supplemental Figure 1 | Pathways explored downstream of AKT.** Light boxes, pathways altered by T-Ag or t-Ag expressed in TtH cells used in the cell-mixing assay of tumour maintenance. Black boxes, pathways altered using the indicated (red lettering) molecules (see reference 4).

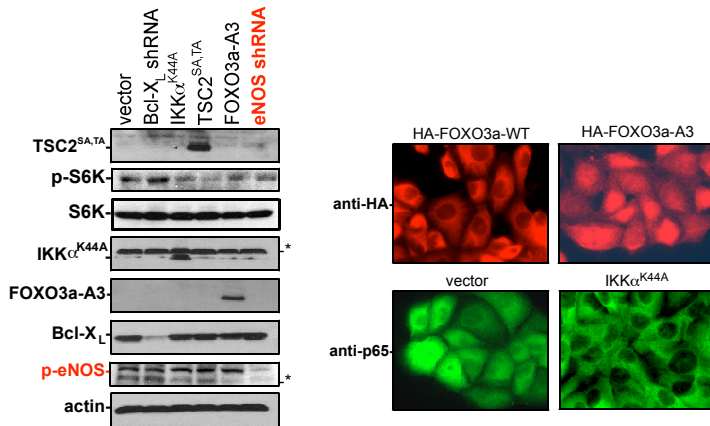

**Supplemental Figure 2 | Confirmation of disruption of pathways downstream of AKT.** (Left) Protein levels assessed by immunoblot of the indicated proteins in PI3K-TtH<sup>LacZ</sup> cells expressing the indicated proteins or shRNA. \*non-specific bands. (Right) Subcellular localization and protein analysis by immunofluorescence. The indicated transgenes were expressed in PI3K-TtH<sup>LacZ</sup> cells. Mutant HA-FOXO3a-A3 demonstrates appropriate localization to the nucleus, and expression of mutant IKK $\alpha$ <sup>K44A</sup> results in exclusion of p65 from the nucleus.

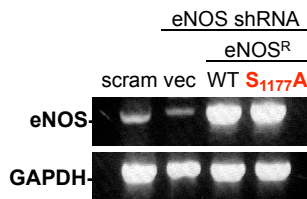

**Supplemental Figure 3 | Confirmation of eNOS knockdown and complementation by eNOS<sup>R</sup> proteins.** mRNA levels assessed by RT-PCR of eNOS in PI3K-TtH<sup>LacZ</sup> expressing scramble control or eNOS shRNA and complemented with either vector or shRNA-resistant eNOS (eNOS<sup>R</sup>) in the wildtype (WT) or S<sub>1177</sub>A mutant configuration. GAPDH: RT-PCR control.

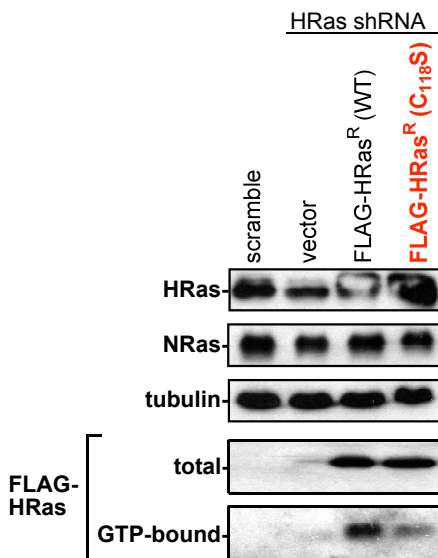

**Supplemental Figure 4 | Confirmation of HRas knockdown and complementation by HRas<sup>R</sup> proteins.** Protein levels assessed by immunoblot of endogenous HRas and NRas, total or GTP-bound wildtype (WT) or C<sub>118</sub>S shRNA-resistant FLAG-HRas<sup>R</sup> in PI3K-TtH<sup>LacZ</sup> cells expressing a scramble control sequence of HRas shRNA and the indicated transgenes. Tubulin serves as a loading control.

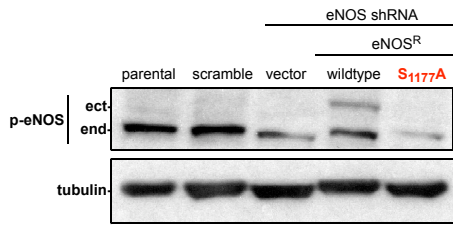

**Supplemental Figure 5 | Confirmation of eNOS knockdown and complementation by eNOS<sup>R</sup> proteins.** Protein levels assessed by immunoblot of ectopic (ect) and endogenous (end) S<sub>1177</sub>-phosphorylated eNOS (p-eNOS) in Ras<sup>G12V</sup>-TtH cells expressing a scramble control sequence or eNOS shRNA with vector, wildtype, or S<sub>1177</sub>A RNAi-resistant eNOS (eNOS<sup>R</sup>). Tubulin: loading control.

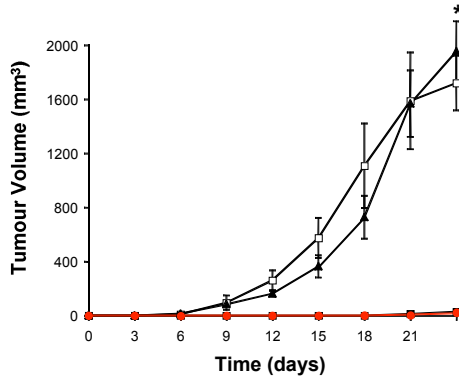

**Supplemental Figure 6 | Tumour growth depends upon S<sub>1177</sub> of eNOS.** Tumour volume versus time of Ras<sup>G12V</sup>-TtH cells expressing scramble (□) or eNOS shRNA with vector (■), wildtype (▲) or S<sub>1177</sub>A (●) RNAi-resistant eNOS. n=4, error bars = s.e.m., \*p<0.001: (□) versus (●).

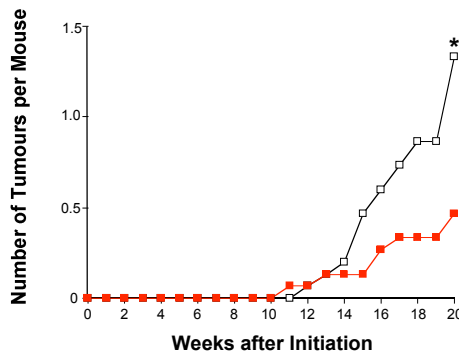

**Supplemental Figure 7 | eNOS<sup>-/-</sup> mice have fewer tumours induced by DMBA/TPA.** Mean number of tumours per eNOS<sup>+/+</sup> (□) versus eNOS<sup>-/-</sup> (■) mouse versus time after initial application of DMBA. n=15, \*p<0.01.

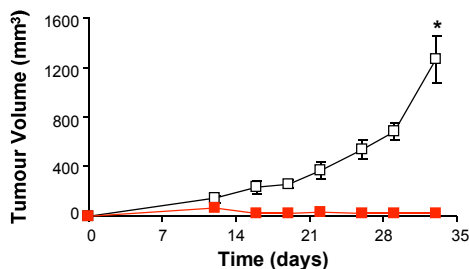

**Supplemental Figure 8 | Knockdown of eNOS inhibits tumor growth of CFPac-1 cells.** Tumour volume versus time of CFPac-1 cells expressing scramble (□) or eNOS shRNA (■). n=4, error bars=s.e.m., \*p<0.01.

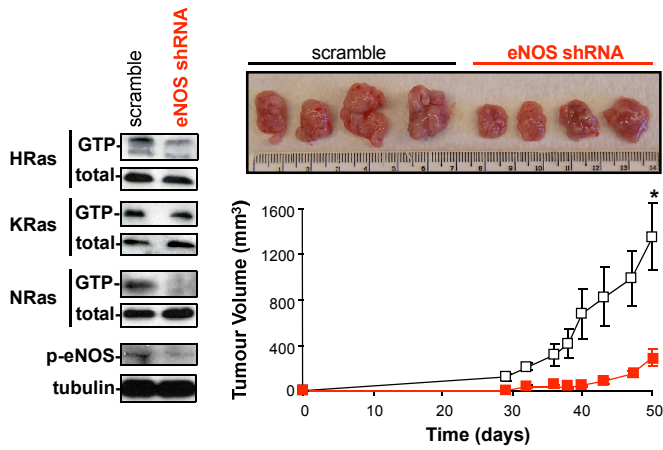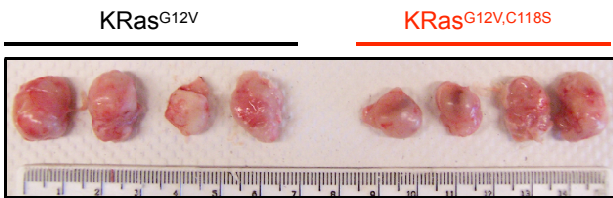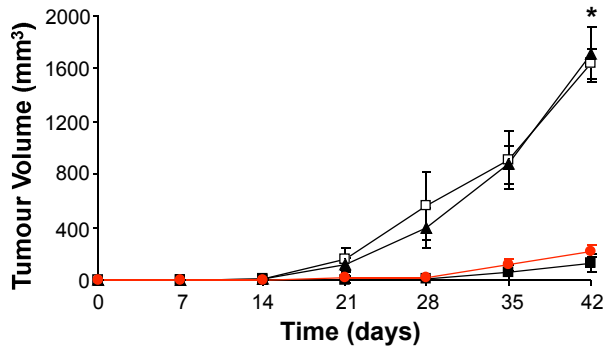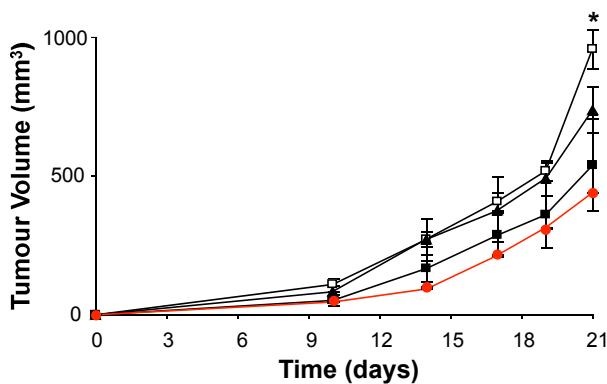

**Supplemental Figure 9 | Knockdown of eNOS inhibits tumour growth of MIAPaCa-2 cells.** *Left*, Protein levels assessed by immunoblot of GTP-bound endogenous HRas, KRas, and NRas, and phosphorylated eNOS (p-eNOS) in , and as loading controls, total HRas, NRas, and HRas, and tubulin (*left*) and excised tumours or tumour growth versus time (*right*) of MIAPaCa-2 cells expressing a scramble control sequence (□) or **eNOS shRNA** (■). n=4, error bars=s.e.m \*p<0.05.

**Supplemental Figure 10 | Oncogenic KRas with a C<sub>118</sub>S mutation remains tumorigenic.** Excised tumours of TtH cells expressing KRas<sup>G12V</sup> or **KRas<sup>G12V,C118S</sup>**.

**Supplemental Figure 11 | Tumour growth of CFPac-1 cells depends upon C<sub>118</sub> of HRas.** Tumour volume versus time of CFPac-1 cells expressing scramble (□) or HRas shRNA with vector (■), wildtype (▲) or C<sub>118</sub>S (●) RNAi-resistant HRas. n=4, error bars=s.e.m., \*p<0.001: (□) versus (●).

**Supplemental Figure 12 | Tumour growth of CFPac-1 cells depends partly upon C<sub>118</sub> of NRas.** Tumour volume versus time of CFPac-1 cells expressing scramble (□) or NRas shRNA with vector (■), wildtype (▲) or C<sub>118</sub>S (●) RNAi-resistant NRas. n=4, error bars=s.e.m., \*p<0.001: (□) versus (●).

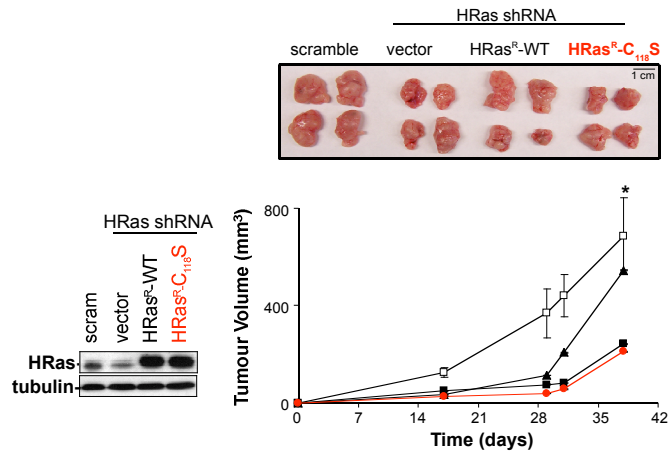

**Supplemental Figure 13 | Tumour growth of MIAPaCa-2 cells depends upon C<sub>118</sub> of HRas.** Protein levels assessed by immunoblot of HRas, or tubulin as a loading control (*left*), and excised tumours and tumour growth versus time (*right*) of MIAPaCa-2 cells expressing a scramble control (scram, □) or HRas shRNA in conjunction with vector control (vector, ■) or FLAG-HRas engineered to be resistant to RNAi (HRas<sup>R</sup>) in the wildtype (WT, ▲) or C<sub>118</sub>S mutant (C<sub>118</sub>S, ●) configuration. n=5, error bars=s.e.m. \*p<0.05: (□) versus (●).

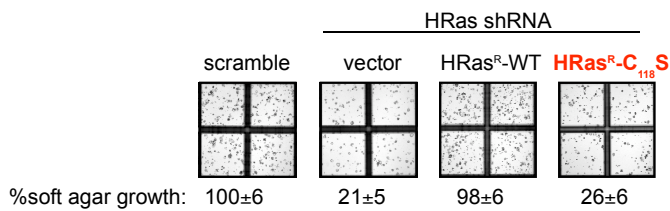

**Supplemental Figure 14 | HRas is required for anchorage independent growth of CFPac-1 cells.** CFPac-1 cells expressing a scramble control or HRas shRNA in conjunction with vector control or HRas engineered to be resistant to RNAi (HRas<sup>R</sup>) in the wildtype (WT) or C<sub>118</sub>S mutant configuration were assayed for growth in soft agar (% of scramble control colonies±s.e.m., from duplicate experiments in triplicate).

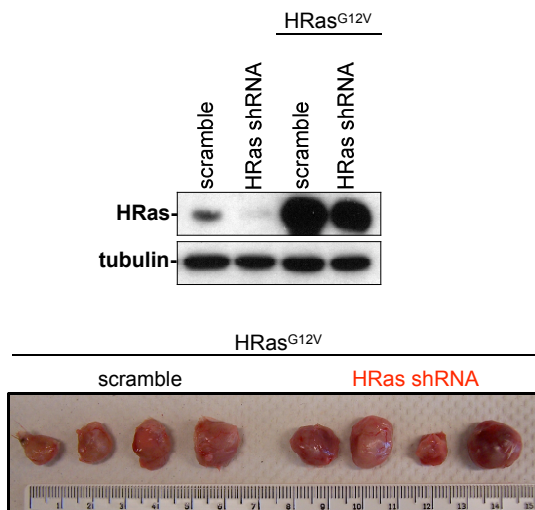

**Supplemental Figure 15 | Loss of wildtype HRas does not inhibit oncogenic HRas<sup>G12V</sup>-mediated tumourigenesis.** Protein levels assessed by immunoblot of HRas, or tubulin as a loading control (*top*), and excised tumours (*bottom*) of TtH cells expressing either scramble or HRas shRNA in addition to RNAi-resistant oncogenic HRas<sup>G12V</sup>.
